# Supplementary material
Source: PubMed Central journal article supplement (PMC8497956)
Supplement: mmc1.pdf [file mmc1.pdf]

## Relating SARS-CoV-2 shedding rate in wastewater to daily positive tests data: A consistent model based approach

**Maria Petala<sup>1</sup>, Margaritis Kostoglou<sup>2</sup>, Thodoris Karapantsios<sup>2</sup>, Chrystsomos Dovas<sup>3</sup>, Theodoros Lytras<sup>4,5</sup>, Dimitrios Paraskevis<sup>6</sup>, Emmanouel Roilides<sup>7</sup>, Anastasia Koutsolioutsou-Benaki<sup>8</sup>, Georgios Panagiotakopoulos<sup>4</sup>, Vana Sypsa<sup>6</sup>, Symeon Metallidis<sup>9</sup>, Anna Papa<sup>10</sup>, Efstratios Stylianidis<sup>11</sup>, Agis Papadopoulos<sup>12</sup>, Sotirios Tsiodras<sup>6</sup>, Nikolaos Papaioannou<sup>3</sup>**

<sup>1</sup>Laboratory of Environmental Engineering & Planning, Department. of Civil Engineering, Aristotle University of Thessaloniki, Thessaloniki, 54 124, Greece

<sup>2</sup>Laboratory of Chemical and Environmental Technology, Dept. of Chemistry, Aristotle University of Thessaloniki, 54 124 Thessaloniki, 54124, Greece

<sup>3</sup>Faculty of Veterinary Medicine, School of Health Sciences, Aristotle University of Thessaloniki, Thessaloniki, 54124, Greece

<sup>4</sup>National Public Health Organization, Athens, Greece

<sup>5</sup>European University Cyprus, Nicosia, Cyprus

<sup>6</sup>National and Kapodistrian University of Athens, Athens, Greece

<sup>7</sup>Infectious Diseases Unit and 3rd Department of Pediatrics, Aristotle University School of Health Sciences, Hippokraton Hospital, Thessaloniki, 54642, Greece

<sup>8</sup>Department of Environmental Health, Directory of Epidemiology and Prevention of Non Communicable Diseases and Injuries, National Public Health Organization, Athens, Greece

<sup>9</sup>Department of Haematology, First Department of Internal Medicine, Faculty of Medicine, AHEPA General Hospital, Aristotle University of Thessaloniki, Thessaloniki, 54636, Greece

<sup>10</sup>Department of Microbiology, Medical School, Aristotle University of Thessaloniki, Thessaloniki, 54124 Greece

<sup>11</sup>School of Spatial Planning and Development, Faculty of Engineering, Aristotle University of Thessaloniki, 54124, Greece

<sup>12</sup>EYATH S.A., Thessaloniki Water Supply and Sewerage Company S.A., Thessaloniki, 54636, Greece

**Table 1.** Physical-chemical characteristics of wastewater samples

| Date                   | Unit              | 2/10/20 | 5/10/20 | 9/10/20 | 12/10/20 | 14/10/20 | 16/10/20 | 19/10/20 | 21/10/20 | 23/10/20 |
|------------------------|-------------------|---------|---------|---------|----------|----------|----------|----------|----------|----------|
| Flow                   | m <sup>3</sup> /d | 143,850 | 140,900 | 141,650 | 147,850  | 157,750  | 158,000  | 147,450  | 142,000  | 139,800  |
| SS                     | mg/L              | 400     | 679     | 637     | 616      | 892      | 835      | 1,083    | 1,084    | 1,019    |
| COD                    | mg/L              | 582     | 1,042   | 1,278   | 938      | 1,284    | 1,144    | 1,509    | 1,480    | 1,518    |
| BOD5                   | mg/L              | 255     | 429     | 515     | 383      | 492      | 446      | 574      | 583      | 564      |
| NH <sub>4</sub> -N (Δ) | mg/L              | 33.5    | 32.7    | 29.6    | 27.8     | 29.3     | 24.5     | 27.8     | 31.5     | 36.3     |
| NO <sub>3</sub> -N (Δ) | mg/L              | 0.92    | 0.92    | 0.99    | 1.36     | 2.33     | 0.92     | 0.66     | 0.87     | 0.23     |
| TN                     | mg/L              | 64      | 64.4    | 61.5    | 63.9     | 93.7     | 59.4     | 76.2     | 71.8     | 89.4     |
| TOTAL-P                | mg/L              |         |         |         | 8.99     | 8.92     |          |          | 13.10    |          |
| Conductivity           | mS/cm             | 7.42    | 7.77    | 8.26    | 7.99     | 4.67     | 3.83     | 7.25     | 6.73     | 5.69     |
| pH                     | -                 | 7.74    | 7.56    | 7.63    | 7.57     | 7.59     | 7.52     | 7.60     | 7.48     | 7.65     |
| DO                     | mg/L              | 0.80    | 1.10    | 0.85    | 1.10     | 1.20     | 0.90     | 1.10     | 0.90     | 1.00     |
| UV254 nm               | cm <sup>-1</sup>  | 0.35    | 0.53    | 0.53    | 0.54     | 0.42     | 0.59     | 0.48     | 0.60     | 0.56     |
| DOC                    | mg/L              | 40.00   | 48.00   | 50.76   | 55.50    | 50.00    | 53.14    | 37.20    | 38.90    | 47.20    |

| Date         | Unit  | 26/10/20 | 28/10/20 | 30/10/20 | 2/11/20 | 4/11/20 | 6/11/20 | 9/11/20 | 11/11/20 | 13/11/20 |
|--------------|-------|----------|----------|----------|---------|---------|---------|---------|----------|----------|
| Flow         | m3/d  | 127,350  | 142,400  | 136,350  | 112,200 | 155,500 | 130,500 | 131,950 | 133,600  | 134,400  |
| SS           | mg/L  | 1,180    | 1,009    | 1,094    | 1,139   | 1,149   | 1,362   | 1,252   | 1,038    | 1,287    |
| COD          | mg/L  | 1,593    | 1,651    | 1,438    | 1,667   | 1,750   | 1,788   | 1,870   | 1,600    | 1,520    |
| BOD5         | mg/L  | 656      | 629      | 521      | 573     | 560     | 824     | 689     | 692      | 690      |
| NH4-N (Δ)    | mg/L  | 32.8     | 30.0     | 31.4     | 29.8    | 29      | 29.8    | 29      | 30.7     | 30.8     |
| NO3-N (Δ)    | mg/L  | 0.65     | 0.92     | 0.77     | 0.93    | 1.6     | 0.9     | 0.75    | 1.38     | 0.66     |
| TN           | mg/L  | 87.3     | 74.3     | 73.0     | 68.7    | 68.6    | 80.2    | 88.5    | 73.2     | 79       |
| TOTAL-P      | mg/L  |          | 12.20    |          |         | 13      |         |         | 11.7     |          |
| Conductivity | mS/cm | 7.15     | 7.52     | 7.90     | 5.96    | 5.20    | 5.18    | 5.21    | 5.17     | 5.46     |
| pH           | -     | 7.66     | 7.61     | 7.77     | 7.69    | 7.72    | 7.70    | 7.80    | 7.82     | 7.68     |
| DO           | mg/L  | 2.20     | 2.17     | 0.45     | 0.51    | 3.15    | 0.40    | 0.74    | 0.53     | 0.46     |
| UV254 nm     | cm-1  | 0.55     | 0.37     | 0.46     | 0.45    | 0.36    | 0.44    | 0.51    | 0.35     | 0.42     |
| DOC          | mg/L  | 48.70    | 32.70    | 46.80    | 46.90   | 36.04   | 40.50   | 46.70   | 41.43    | 57.90    |

| Date         | Unit  | 16/11/20 | 18/11/20 | 20/11/20 | 23/11/20 | 25/11/20 | 27/11/20 | 30/11/20 | 2/12/20 | 4/12/20 |
|--------------|-------|----------|----------|----------|----------|----------|----------|----------|---------|---------|
| Flow         | m3/d  | 140,050  | 131,050  | 130,800  | 136,350  | 138,650  | 127,850  | 177,200  | 139,300 | 171,050 |
| SS           | mg/L  | 1,121    | 1,074    | 1,117    | 1,131    | 1,106    | 957      | 864      | 1,055   | 836     |
| COD          | mg/L  | 1,554    | 1,460    | 1,367    | 1,752    | 1,536    | 1,316    | 1,273    | 1,297   | 1,187   |
| BOD5         | mg/L  | 612      | 634      | 682      | 715      | 648      | 608      | 596      | 571     | 487     |
| NH4-N (Δ)    | mg/L  | 32.6     | 29.5     | 30.7     | 29.4     | 30.2     | 30.9     | 25.8     | 31.3    | 28.4    |
| NO3-N (Δ)    | mg/L  | 1.1      | 1.47     | 0.6      | 1.4      | 1.44     | 0.54     | 1.07     | 1.05    | 0.66    |
| TN           | mg/L  | 80.1     | 69.4     | 72.2     | 72.1     | 76.7     | 74.5     | 69.4     | 70.3    | 58      |
| TOTAL-P      | mg/L  |          | 13.7     |          |          | 13.3     |          |          | 10.4    |         |
| Conductivity | mS/cm | 5.24     | 5.56     | 5.49     | 4.86     | 4.83     | 5.23     | 5.63     | 6.40    | 6.98    |
| pH           | -     | 7.70     | 7.68     | 7.65     | 7.53     | 7.73     | 7.64     | 7.87     | 8.01    | 7.50    |
| DO           | mg/L  | 1.75     | 3.09     | 1.40     | 1.78     | 3.37     | 0.94     | 3.77     | 4.50    | 2.22    |
| UV254 nm     | cm-1  | 0.40     | 0.47     | 0.45     | 0.69     | 0.48     | 0.50     | 0.85     | 0.83    | 0.41    |
| DOC          | mg/L  | 62.40    | 51.07    | 44.52    | 52.61    | 46.83    | 52.63    | 46.87    | 62.50   | 32.76   |

| Date         | Unit  | 7/12/20 | 9/12/20 | 11/12/20 | 14/12/20 | 16/12/20 | 18/12/20 | 21/12/20 |
|--------------|-------|---------|---------|----------|----------|----------|----------|----------|
| Flow         | m3/d  | 196,150 | 175,350 | 180,400  | 198,250  | 157,450  | 153,600  | 148,800  |
| SS           | mg/L  | 633     | 924     | 767      | 413      | 557      | 639      | 600      |
| COD          | mg/L  | 900     | 1,108   | 918      | 788      | 824      | 1,029    | 943      |
| BOD5         | mg/L  | 422     | 472     | 368      | 335      | 342      | 391      | 436      |
| NH4-N (Δ)    | mg/L  | 18.5    | 40.8    | 18.1     | 17.1     | 24       | 26.9     | 29.4     |
| NO3-N (Δ)    | mg/L  | 0.99    | 2.3     | 1.15     | 1.25     | 1.15     | 0.92     | 2.05     |
| TN           | mg/L  | 40.3    | 67.8    | 45       | 35.1     | 57.3     | 56.9     | 53.6     |
| TOTAL-P      | mg/L  | 7.63    | 8.42    |          | 5.76     | 16.8     | 9.65     | 8.55     |
| Conductivity | mS/cm | 8.07    | 15.45   | 16.52    | 16.52    | 11.20    | 8.16     | 6.85     |
| pH           | -     | 7.35    | 7.95    | 7.51     | 7.43     | 7.50     | 7.80     | 7.80     |
| DO           | mg/L  | 6.00    | 4.51    | 2.97     | 5.70     | 4.30     | 2.81     | 4.02     |

|          |      |       |       |       |       |       |       |       |
|----------|------|-------|-------|-------|-------|-------|-------|-------|
| UV254 nm | cm-1 | 0.30  | 0.48  | 0.39  | 0.53  | 0.34  | 0.33  | 0.38  |
| DOC      | mg/L | 30.43 | 35.40 | 31.91 | 30.30 | 34.41 | 38.10 | 39.10 |

| Date                   | Unit              | 23/12/20 | 25/12/20 | 28/12/20 | 30/12/20 | 1/1/21  | 1/4/21  | 1/6/21  |
|------------------------|-------------------|----------|----------|----------|----------|---------|---------|---------|
| Flow                   | m <sup>3</sup> /d | 135,180  | 141,000  | 135,150  | 135,600  | 145,850 | 175,700 | 151,470 |
| SS                     | mg/L              | 608      | 511      | 835      | 686      | 596     | 635     | 507     |
| COD                    | mg/L              | 979      | 868      | 1,177    | 1,023    | 1,189   | 869     | 880     |
| BOD5                   | mg/L              | 482      | 349      | 395      | 459      | 533     | 326     | 355     |
| NH <sub>4</sub> -N (Δ) | mg/L              | 30.2     | 33.3     | 33.5     | 32.1     | 39.5    | 19.5    | 38.0    |
| NO <sub>3</sub> -N (Δ) | mg/L              | 0.7      | 0.23     | 0.99     | 0.53     | 0.23    | 1.60    | 0.75    |
| TN                     | mg/L              | 56.4     | 57.9     | 65.7     |          | 70.7    | 41.5    | 88.5    |
| TOTAL-P                | mg/L              | 11.5     | 13.30    | 13.10    | 15.6     | 10.40   | 12.1    | 10.5    |
| Conductivity           | mS/cm             | 6.45     | 7        | 7.13     | 8.21     | 9       | 5.5     | 9.05    |
| pH                     | -                 | 7.78     | 7.6      | 7.77     | 7.68     | 7.4     | 7.27    | 7.64    |
| DO                     | mg/L              | 2.90     | 2.04     | 3.3      | 3.2      | 1.66    | 5.9     | 3.12    |
| UV254 nm               | cm-1              | 0.420    | 0.296    | 0.422    | 0.675    | 0.364   | 0.288   | 0.437   |
| DOC                    | mg/L              | 47.60    | 37       | 57       | 58.3     | 43.1    | 32.6    | 38.7    |

**Table 2.** Daily numbers of COVID-19 infected people reported in the city of Thessaloniki, adjusted to specimen collection date.

| Date       | Reported cases | Date       | Reported cases | Date       | Reported cases |
|------------|----------------|------------|----------------|------------|----------------|
| 2020-10-05 | 17             | 2020-11-06 | 706            | 2020-12-08 | 237            |
| 2020-10-06 | 20             | 2020-11-07 | 696            | 2020-12-09 | 224            |
| 2020-10-07 | 23             | 2020-11-08 | 684            | 2020-12-10 | 213            |
| 2020-10-08 | 27             | 2020-11-09 | 671            | 2020-12-11 | 202            |
| 2020-10-09 | 32             | 2020-11-10 | 656            | 2020-12-12 | 190            |
| 2020-10-10 | 38             | 2020-11-11 | 639            | 2020-12-13 | 181            |
| 2020-10-11 | 45             | 2020-11-12 | 621            | 2020-12-14 | 172            |
| 2020-10-12 | 54             | 2020-11-13 | 605            | 2020-12-15 | 163            |
| 2020-10-13 | 66             | 2020-11-14 | 587            | 2020-12-16 | 155            |
| 2020-10-14 | 80             | 2020-11-15 | 569            | 2020-12-17 | 148            |
| 2020-10-15 | 97             | 2020-11-16 | 551            | 2020-12-18 | 142            |
| 2020-10-16 | 117            | 2020-11-17 | 534            | 2020-12-19 | 136            |
| 2020-10-17 | 140            | 2020-11-18 | 517            | 2020-12-20 | 130            |
| 2020-10-18 | 168            | 2020-11-19 | 499            | 2020-12-21 | 125            |
| 2020-10-19 | 199            | 2020-11-20 | 484            | 2020-12-22 | 121            |
| 2020-10-20 | 234            | 2020-11-21 | 469            | 2020-12-23 | 117            |
| 2020-10-21 | 273            | 2020-11-22 | 454            | 2020-12-24 | 113            |
| 2020-10-22 | 314            | 2020-11-23 | 438            | 2020-12-25 | 110            |
| 2020-10-23 | 358            | 2020-11-24 | 423            | 2020-12-26 | 106            |

|            |     |            |     |            |     |
|------------|-----|------------|-----|------------|-----|
| 2020-10-24 | 404 | 2020-11-25 | 410 | 2020-12-27 | 103 |
| 2020-10-25 | 449 | 2020-11-26 | 396 | 2020-12-28 | 99  |
| 2020-10-26 | 494 | 2020-11-27 | 383 | 2020-12-29 | 96  |
| 2020-10-27 | 538 | 2020-11-28 | 370 | 2020-12-30 | 93  |
| 2020-10-28 | 579 | 2020-11-29 | 356 | 2020-12-31 | 90  |
| 2020-10-29 | 616 | 2020-11-30 | 343 | 2021-01-01 | 86  |
| 2020-10-30 | 648 | 2020-12-01 | 330 | 2021-01-02 | 83  |
| 2020-10-31 | 675 | 2020-12-02 | 316 | 2021-01-03 | 80  |
| 2020-11-01 | 696 | 2020-12-03 | 303 | 2021-01-04 | 76  |
| 2020-11-02 | 715 | 2020-12-04 | 289 | 2021-01-05 | 73  |
| 2020-11-03 | 710 | 2020-12-05 | 276 | 2021-01-06 | 70  |
| 2020-11-04 | 713 | 2020-12-06 | 263 |            |     |
| 2020-11-05 | 711 | 2020-12-07 | 249 |            |     |
